# Supplementary material
Source: PubMed Central journal article supplement (PMC4772424)
Supplement: NIHMS761177-supplement-supplement_1.pdf [file NIHMS761177-supplement-supplement_1.pdf]

Supplemental data:

Table 1S: Candidate single nucleotide polymorphism in pharmacogenes involved in Cy pharmacodynamics and pharmacokinetics. Frequency in 93 non-Hodgkin lymphoma patients treated with high dose Cy with hazard ratio for relapse with 95% confidence intervals and raw p-value is shown.

|    | Reference Single Nucleotide Polymorphism (SNP) ID number | Gene abbreviation (position of polymorphism) | Gene name                                                                             | Genotype | Frequency of SNP in cohort of 93 NHL patients | Relapse Hazard Ratio (95% CI) | Raw p-value |
|----|----------------------------------------------------------|----------------------------------------------|---------------------------------------------------------------------------------------|----------|-----------------------------------------------|-------------------------------|-------------|
| 1  | rs3211371                                                | CYP2B6                                       | cytochrome P450, family 2, subfamily B, polypeptide 6                                 | CT       | 23%                                           | 3.3 (1.6 - 6.5)               | 0.001       |
| 2  | rs7483                                                   | GSTM3                                        | glutathione S-transferase mu 3 (brain)                                                | GA       | 51%                                           | 2.3 (1.0 - 4.9)               | 0.038       |
| 3  | rs2740574                                                | CYP3A4                                       | cytochrome P450, family 3, subfamily A, polypeptide 4                                 | AG       | 16%                                           | 2.2 (1.1 - 4.8)               | 0.037       |
| 4  | rs7483                                                   | GSTM3                                        | glutathione S-transferase mu 3 (brain)                                                | AA       | 12%                                           | 1.9 (0.6 - 6.3)               | 0.295       |
| 5  | rs1805087                                                | MTR                                          | 5-methyltetrahydrofolate-homocysteine methyltransferase                               | AG       | 33%                                           | 1.8 (0.9 - 3.5)               | 0.083       |
| 6  | rs1128503                                                | ABCB1                                        | ATP-binding cassette, sub-family B (MDR/TAP), member 1                                | CT       | 46%                                           | 1.8 (0.8 - 4.2)               | 0.153       |
| 7  | rs11615                                                  | ERCC1                                        | excision repair cross-complementing rodent repair deficiency, complementation group 1 | CC       | 15%                                           | 1.6 (0.7 - 3.8)               | 0.243       |
| 8  | rs776746                                                 | CYP3A5                                       | cytochrome P450, family 3, subfamily A, polypeptide 5                                 | GA       | 21%                                           | 1.5 (0.7 - 3.3)               | 0.275       |
| 9  | rs2228100                                                | ALDH3A1                                      | aldehyde dehydrogenase 3 family, member A1                                            | GG       | 11%                                           | 1.5 (0.5 - 4.0)               | 0.446       |
| 10 | rs1042522                                                | TP53                                         | tumor protein p53                                                                     | GC/CC    | 52%                                           | 1.4 (0.7 - 2.7)               | 0.345       |
| 11 | rs3212986                                                | ERCC1                                        | excision repair cross-complementing rodent repair deficiency, complementation group 1 | TT       | 8%                                            | 1.4 (0.5 - 4.0)               | 0.584       |
| 12 | rs1800566                                                | NQO1                                         | NAD(P)H dehydrogenase, quinone 1                                                      | CT       | 36%                                           | 1.4 (0.4 - 4.8)               | 0.588       |
| 13 | rs4726                                                   | SLC3A2                                       | solute carrier family 3 member 2                                                      | CT       | 36%                                           | 1.3 (0.7 - 2.7)               | 0.430       |
| 14 | rs1051266                                                | SLC19A1                                      | solute carrier family 19 (folate transporter), member 1                               | GA       | 49%                                           | 1.3 (0.6 - 2.9)               | 0.482       |

|    |            |          |                                                                                            |       |     |                 |       |
|----|------------|----------|--------------------------------------------------------------------------------------------|-------|-----|-----------------|-------|
| 15 | rs1128503  | ABCB1    | ATP-binding cassette, sub-family B (MDR/TAP), member 1                                     | TT    | 24% | 1.3 (0.5 - 3.5) | 0.561 |
| 16 | rs723685   | SLC22A16 | solute carrier family 22 (organic cation/carnitine transporter), member 16                 | TC    | 19% | 1.2 (0.6 - 2.7) | 0.605 |
| 17 | rs1800566  | NQO1     | NAD(P)H dehydrogenase, quinone 1                                                           | TT    | 7%  | 1.2 (0.6 - 2.5) | 0.589 |
| 18 | rs1045642  | ABCB1    | ATP-binding cassette, sub-family B (MDR/TAP), member 1                                     | TC    | 44% | 1.2 (0.6 - 2.5) | 0.680 |
| 19 | rs9561778  | ABCC4    | ATP-binding cassette, sub-family C (CFTR/MRP), member 4                                    | GT/TT | 36% | 1.2 (0.6 - 2.4) | 0.657 |
| 20 | rs17367504 | MTHFR    | 5,10-methylenetetrahydrofolate reductase                                                   | AG/GG | 17% | 1.2 (0.5 - 2.8) | 0.624 |
| 21 | rs4726     | SLC3A2   | solute carrier family 3 (activators of dibasic and neutral amino acid transport), member 2 | TT    | 8%  | 1.2 (0.3 - 4.0) | 0.794 |
| 22 | rs4880     | SOD2     | superoxide dismutase 2, mitochondrial                                                      | CT    | 41% | 1.1 (0.5 - 2.3) | 0.890 |
| 23 | rs2070676  | CYP2E1   | cytochrome P450, family 2, subfamily E, polypeptide 1                                      | CG    | 12% | 1.1 (0.4 - 3.3) | 0.794 |
| 24 | rs13181    | ERCC2    | excision repair cross-complementing rodent repair deficiency, complementation group 2      | GG    | 11% | 1.1 (0.4 - 3.0) | 0.887 |
| 25 | rs1138272  | GSTP1    | glutathione S-transferase pi 1                                                             | CT/TT | 14% | 1.1 (0.4 - 2.9) | 0.798 |
| 26 | rs8192709  | CYP2B6   | cytochrome P450, family 2, subfamily B, polypeptide 6                                      | CT    | 11% | 1.1 (0.4 - 2.8) | 0.904 |
| 27 | rs25487    | XRCC1    | X-ray repair complementing defective repair in Chinese hamster cells 1                     | AA    | 15% | 1.1 (0.4 - 2.7) | 0.846 |
| 28 | rs1805087  | MTR      | 5-methyltetrahydrofolate-homocysteine methyltransferase                                    | GG    | 7%  | 1.1 (0.2 - 4.5) | 0.944 |
| 29 | rs2228100  | ALDH3A1  | aldehyde dehydrogenase 3 family, member A1                                                 | CG    | 35% | 1.0 (0.5 - 2.1) | 0.929 |
| 30 | rs1695     | GSTP1    | glutathione S-transferase pi 1                                                             | AG    | 46% | 0.9 (0.5 - 1.9) | 0.850 |
| 31 | rs25487    | XRCC1    | X-ray repair complementing defective repair in Chinese hamster cells 1                     | GA    | 46% | 0.9 (0.5 - 1.9) | 0.863 |

|    |            |          |                                                                                       |       |     |                 |       |
|----|------------|----------|---------------------------------------------------------------------------------------|-------|-----|-----------------|-------|
| 32 | rs714368   | SLC22A16 | solute carrier family 22 (organic cation/carnitine transporter), member 16            | AG/GG | 39% | 0.9 (0.5 - 1.8) | 0.826 |
| 33 | rs2230054  | CXCR2    | interleukin 8 receptor, beta                                                          | TT    | 24% | 0.9 (0.4 - 2.3) | 0.867 |
| 34 | rs1045642  | ABCB1    | ATP-binding cassette, sub-family B (MDR/TAP), member 1                                | CC    | 24% | 0.9 (0.3 - 2.2) | 0.766 |
| 35 | rs13181    | ERCC2    | excision repair cross-complementing rodent repair deficiency, complementation group 2 | TG    | 50% | 0.8 (0.4 - 1.8) | 0.659 |
| 36 | rs4073     | IL8      | interleukin 8                                                                         | AA    | 24% | 0.8 (0.4 - 1.6) | 0.462 |
| 37 | rs12248560 | CYP2C19  | cytochrome P450, family 2, subfamily C, polypeptide 19                                | CT/TT | 34% | 0.8 (0.4 - 1.6) | 0.519 |
| 38 | rs1143684  | NQO2     | NAD(P)H dehydrogenase, quinone 2                                                      | TC/CC | 41% | 0.8 (0.4 - 1.6) | 0.602 |
| 39 | rs3745274  | CYP2B6   | cytochrome P450, family 2, subfamily B, polypeptide 6                                 | GT    | 39% | 0.8 (0.4 - 1.5) | 0.442 |
| 40 | rs2279343  | CYP2B6   | cytochrome P450, family 2, subfamily B, polypeptide 6                                 | AG    | 40% | 0.8 (0.4 - 1.5) | 0.446 |
| 41 | rs1695     | GSTP1    | glutathione S-transferase pi 1                                                        | GG    | 14% | 0.8 (0.3 - 2.6) | 0.741 |
| 42 | rs4880     | SOD2     | superoxide dismutase 2, mitochondrial                                                 | TT    | 28% | 0.8 (0.3 - 1.9) | 0.537 |
| 43 | rs4793665  | ABCC3    | ATP-binding cassette, sub-family C (CFTR/MRP), member 3                               | CC    | 25% | 0.8 (0.3 - 1.8) | 0.555 |
| 44 | rs3957357  | GSTA1    | glutathione S-transferase alpha 1                                                     | AA    | 15% | 0.7 (0.4 - 1.5) | 0.398 |
| 45 | rs2230054  | CXCR2    | interleukin 8 receptor, beta                                                          | CT    | 51% | 0.7 (0.3 - 1.7) | 0.488 |
| 46 | rs4793665  | ABCC3    | ATP-binding cassette, sub-family C (CFTR/MRP), member 3                               | TC    | 41% | 0.7 (0.3 - 1.5) | 0.330 |
| 47 | rs747199   | SLC29A1  | solute carrier family 29 (nucleoside transporters), member 1                          | CG/GG | 24% | 0.7 (0.3 - 1.5) | 0.373 |
| 48 | rs11615    | ERCC1    | excision repair cross-complementing rodent repair deficiency, complementation group 1 | TC    | 45% | 0.7 (0.3 - 1.4) | 0.317 |
| 49 | rs17997935 | GSTM3    | glutathione S-transferase mu 3 (brain)                                                | AA    | 11% | 0.7 (0.2 - 2.1) | 0.529 |

|                                                                                                                                         |                                     |          |                                                                                       |       |     |                 |       |
|-----------------------------------------------------------------------------------------------------------------------------------------|-------------------------------------|----------|---------------------------------------------------------------------------------------|-------|-----|-----------------|-------|
| 50                                                                                                                                      | rs4244285                           | CYP2C19  | cytochrome P450, family 2, subfamily C, polypeptide 19                                | GA/AA | 25% | 0.6 (0.3 - 1.3) | 0.197 |
| 51                                                                                                                                      | rs12210538                          | SLC22A1  | solute carrier family 22 (organic cation transporter), member 1                       | AG/GG | 33% | 0.6 (0.3 - 1.3) | 0.198 |
| 52                                                                                                                                      | rs3212986                           | ERCC1    | excision repair cross-complementing rodent repair deficiency, complementation group 1 | GT    | 32% | 0.6 (0.3 - 1.3) | 0.229 |
| 53                                                                                                                                      | rs17997935                          | GSTM3    | glutathione S-transferase mu 3                                                        | GA    | 44% | 0.6 (0.3 - 1.2) | 0.127 |
| 54                                                                                                                                      | rs1051266                           | SLC19A1  | solute carrier family 19 (folate transporter), member 1                               | AA    | 19% | 0.6 (0.2 - 2.0) | 0.435 |
| 55                                                                                                                                      | rs3957357                           | GSTA1    | glutathione S-transferase alpha 1                                                     | GA    | 49% | 0.6 (0.2 - 1.7) | 0.314 |
| 56                                                                                                                                      | rs4073                              | IL8      | interleukin 8                                                                         | TA    | 46% | 0.6 (0.2 - 1.4) | 0.223 |
| <b>CYP2B6 alleles based on CYP allele nomenclature website: (<a href="http://www.cypalleles.ki.se">http://www.cypalleles.ki.se</a>)</b> |                                     |          |                                                                                       |       |     |                 |       |
|                                                                                                                                         | rs2279343 and rs3745274             | CYP2B6*6 | cytochrome P450, family 2, subfamily B, polypeptide 6                                 |       | 13% | 0.2 (0.1 - 1.0) | 0.051 |
|                                                                                                                                         | rs3211371                           | CYP2B6*5 | cytochrome P450, family 2, subfamily B, polypeptide 6                                 |       | 23% | 3.3 (1.6 - 6.5) | 0.001 |
|                                                                                                                                         | rs2279343 and absence of rs 3745274 | CYP2B6*4 | cytochrome P450, family 2, subfamily B, polypeptide 6                                 |       | 1%  | N/A             |       |
